# Supplementary material for: Nicotine Acts on Growth Plate Chondrocytes to Delay Skeletal Growth through the α7 Neuronal Nicotinic Acetylcholine Receptor
Source: PubMed Central journal article supplement (PMC2596484; doi:10.1371/journal.pone.0003945), 2008-12-16
Supplement: pone.0003945.s001.pdf [file pone.0003945.s001.pdf]

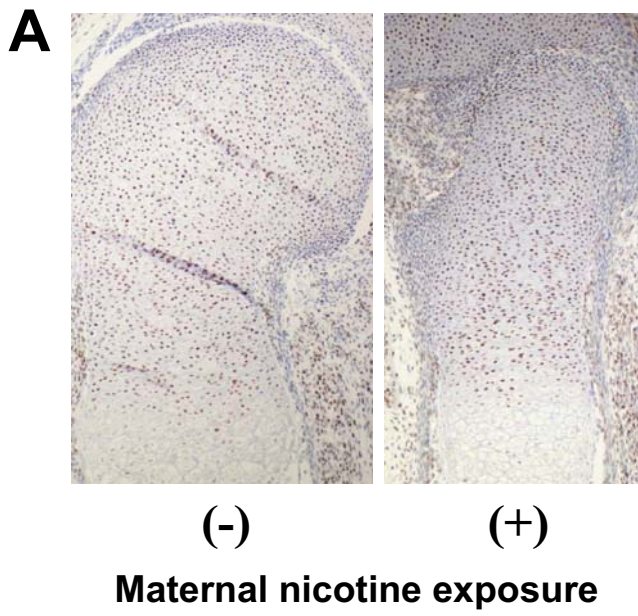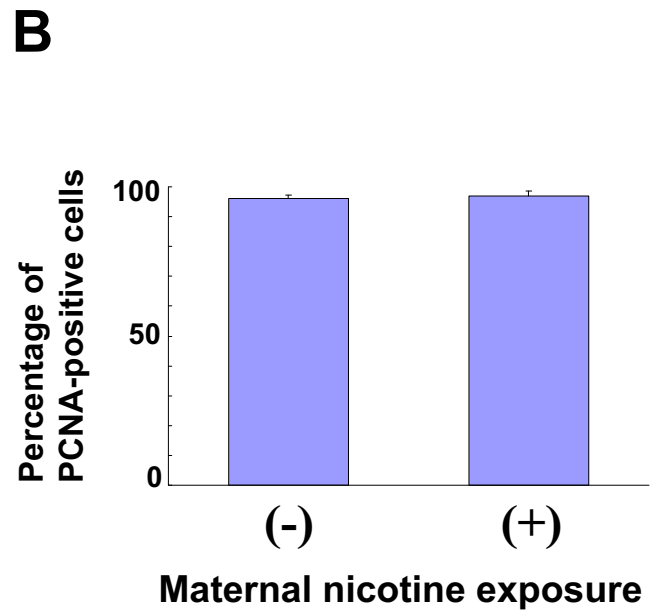

**Figure S1**
