# Supplementary material for: Nicotine Acts on Growth Plate Chondrocytes to Delay Skeletal Growth through the α7 Neuronal Nicotinic Acetylcholine Receptor
Source: PubMed Central journal article supplement (PMC2596484; doi:10.1371/journal.pone.0003945), 2008-12-16
Supplement: pone.0003945.s002.pdf [file pone.0003945.s002.pdf]

Table S1. primers for nAChR subunit genes

| Gene product           | Primer                    |
|------------------------|---------------------------|
| nAChR- $\alpha$ 1-for  | CAGAAAATGAGCTGAGCTTAGC    |
| nAChR- $\alpha$ 1-rev  | CTAAAGAGGGTTCACCTCCTCAGG  |
| nAChR- $\alpha$ 2-for  | GTGGAGGAGGAGGACAGA        |
| nAChR- $\alpha$ 2-rev  | CTTCTGCATGTGGGGTGATA      |
| nAChR- $\alpha$ 3-for  | CAGAGTCCAAAGGCTGCAAG      |
| nAChR- $\alpha$ 3-rev  | AGAGAGGGACAGCACAGCAT      |
| nAChR- $\alpha$ 4-for  | CTCACCGTCCTTCTGTGTC       |
| nAChR- $\alpha$ 4-rev  | CTGGCTTTCTCAGCTTCCAG      |
| nAChR- $\alpha$ 5-for  | CTTCACACGCTTCCCAAACCT     |
| nAChR- $\alpha$ 5-rev  | CTTCAACAACCTCACGGACA      |
| nAChR- $\alpha$ 6-for  | TCCATCGTGGTACTGTGT        |
| nAChR- $\alpha$ 6-rev  | AGGCCACCTCATCAGCAG        |
| nAChR- $\alpha$ 7-for  | GTACGCTGGTTTTCCCTTTGA     |
| nAChR- $\alpha$ 7-rev  | CCACTAGGTCCCATTCTC        |
| nAChR- $\alpha$ 9-for  | GAAAGCAGCCAGGAACAAAG      |
| nAChR- $\alpha$ 9-rev  | GCACTTGGCGATGTACTCAA      |
| nAChR- $\alpha$ 10-for | ACACAAGTGCCCTGAGACCT      |
| nAChR- $\alpha$ 10-rev | TCCCATCGTAGGTAGGCATC      |
| nAChR- $\beta$ 1-for   | GTCTCAAACCTGTGGGTTTCA     |
| nAChR- $\beta$ 1-rev   | GCACAGGTGCTGACCTATAG      |
| nAChR- $\beta$ 2-for   | ACTGGAAGTACGTCGCC         |
| nAChR- $\beta$ 2-rev   | CACTACTGTGCAGCAGAGG       |
| nAChR- $\beta$ 3-for   | ATTACACCTTAGACCTGACATCTGG |
| nAChR- $\beta$ 3-rev   | GTAGAACAAGCACATGCATTTG    |
| nAChR- $\beta$ 4-for   | CTGAATGCCTTGGAGGG         |
| nAChR- $\beta$ 4-rev   | GCATAGTAGGTGCTGCTACG      |
| nAChR- $\delta$ -for   | GGAGCCAGGAGACAGCAG        |
| nAChR- $\delta$ -rev   | CCTGTCTTGATTTTCAGGGGA     |
| nAChR- $\epsilon$ -for | CATTATGATCCCTTCCCCCT      |
| nAChR- $\epsilon$ -rev | GCTTTCTGGAAGACTGGCAC      |
| nAChR- $\gamma$ -for   | CTCACCACTGAGCCAACC        |
| nAChR- $\gamma$ -rev   | ACTGCAGCAGGACACTAGCC      |
| GAPDH-for              | CGTCTTACCACCATGGAGA       |
| GAPDH-rev              | CGGCCATCACGCCACAGCTT      |
