# Supplementary material for: Nicotine Acts on Growth Plate Chondrocytes to Delay Skeletal Growth through the α7 Neuronal Nicotinic Acetylcholine Receptor
Source: PubMed Central journal article supplement (PMC2596484; doi:10.1371/journal.pone.0003945), 2008-12-16
Supplement: pone.0003945.s003.pdf [file pone.0003945.s003.pdf]

Table S2. primers for chondrocyte specific genes

| Gene product | Primer                 |
|--------------|------------------------|
| AGC79-for    | TACTACTGGCGAGCACTGTAAC |
| AGC79-rev    | CAGTGGCCCTGGTACTTGTT   |
| ALP-for      | AACACCACCCAGGGGAAC     |
| ALP-rev      | GGTCACAATGCCACAGATT    |
| COL2A1-for   | TGTCAGGGCCAGGATGTC     |
| COL2A1-rev   | ATCATTATACCTCTGCCCATCC |
| COL10A1-for  | CACCTTCTGCACTGCTCATC   |
| COL10A1-rev  | GGCAGCATATTCTCAGATGGA  |
| IHH-for      | TGCATTGCTCCGTCAAGTC    |
| IHH-rev      | CCACTCTCCAGGCGTACCT    |
| MMP13-for    | CCAGTCTCCGAGGAGAAACA   |
| MMP13-rev    | AAAAACAGCTCCGCATCAAC   |
| PTHr1-for    | CCTGAGTCTGAGGAGGACAAG  |
| PTHr1-rev    | CACAGGATGTGGTCCCAT     |
| SOX9-for     | GTACCCGCACTTGCACAAC    |
| SOX9-rev     | TCGCTCTCGTTCAGAAGTCTC  |
| VEGF22-for   | CATTGGAGCCTTGCCTTG     |
| VEGF22-rev   | ATGATTCTGCCCTCCTCCTT   |
| GAPDH-for    | AGCCACATCGCTCAGACA     |
| GAPDH-rev    | GCCCAATACGACCAAATCC    |
| COL1A1-for   | GGGATTCCCTGGACCTAAAG   |
| COL1A1-rev   | GGAACACCTCGCTCTCCAG    |
